# Supplementary material for: First evidence of the dramatic enhancement of the reactivity of methyl formate (HC(O)OCH3) with OH at temperatures of the interstellar medium: a gas-phase kinetic study between 22 K and 64 K
Source: Royal Society of Chemistry journal article supplement (doi:10.1039/c5cp06369h), 2015-12-08
Supplement: c5cp06369h1.pdf [file c5cp06369h1.pdf]

First evidence of the dramatic enhancement of the reactivity of methyl formate (HC(O)OCH<sub>3</sub>) with OH at temperatures of the interstellar medium: A gas-phase kinetic study between 22 K and 64 K

*E. Jiménez<sup>1,2,\*</sup>, M. Antiñolo<sup>1,2</sup>, B. Ballesteros,<sup>1,2</sup> A. Canosa,<sup>3</sup> and J. Albaladejo<sup>1,2</sup>*

**SUPPORTING INFORMATION**

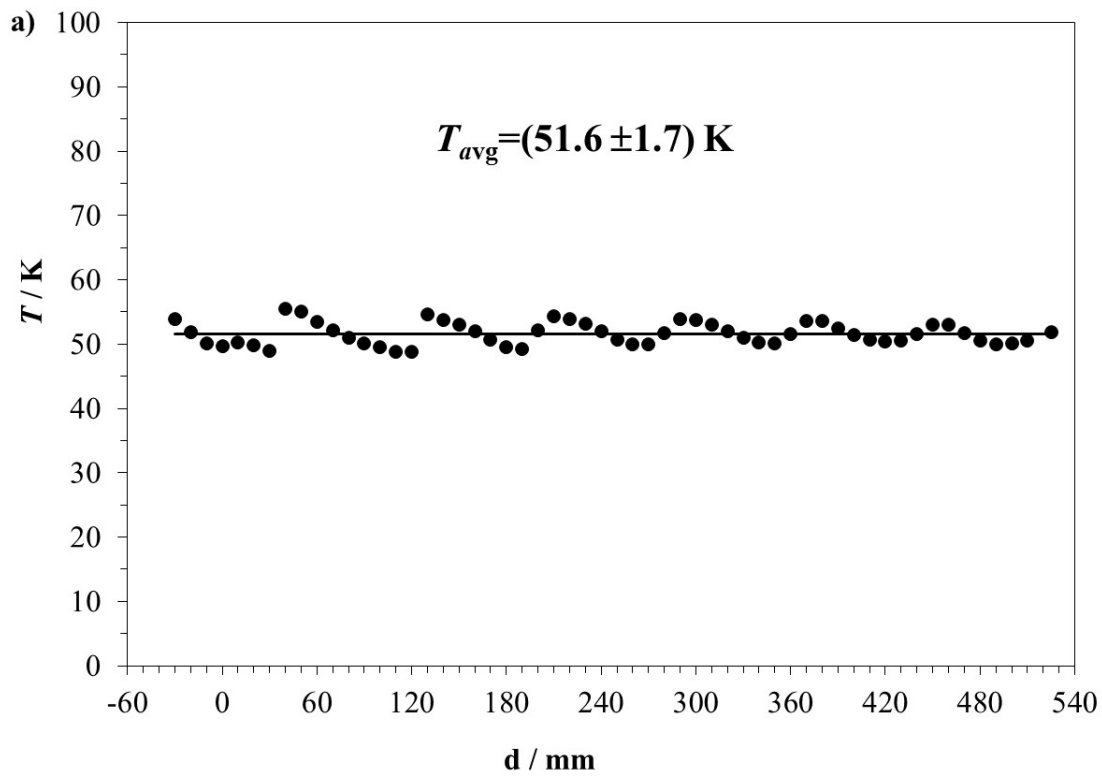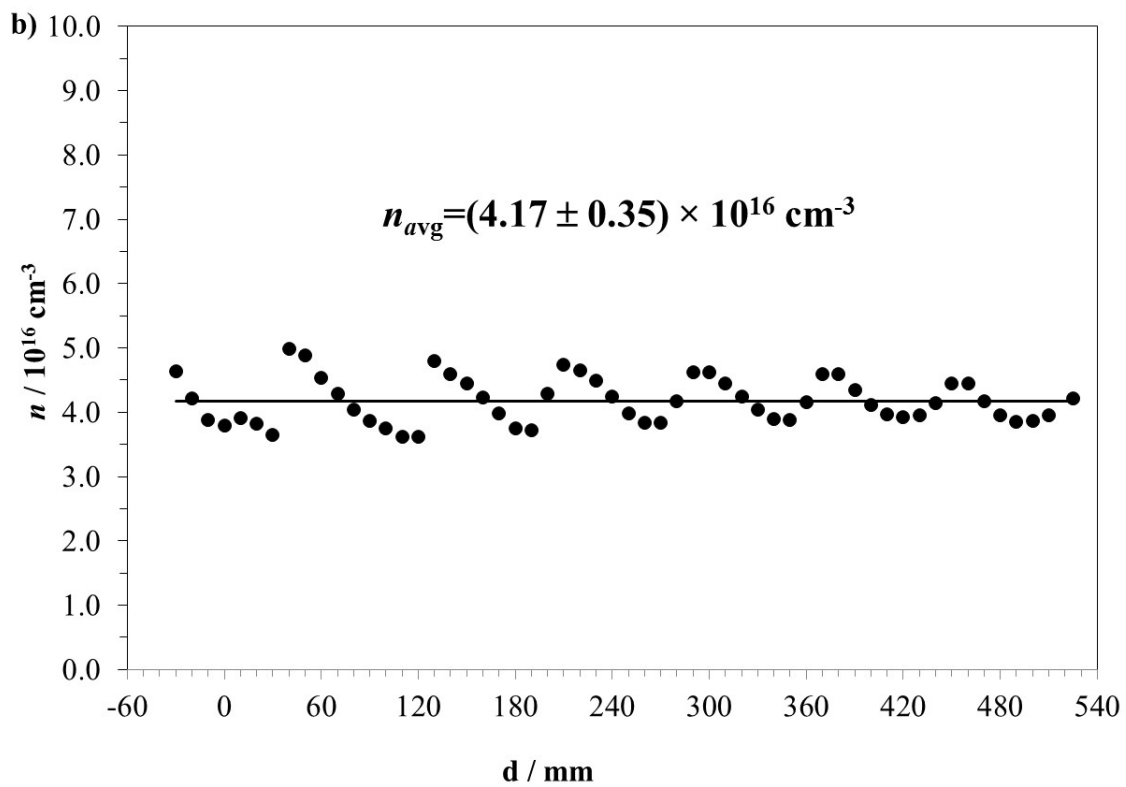

**Fig S1.** Spatial profiles of the temperature and total gas density of the jet for experimental conditions C. Uncertainty is  $\pm\sigma$ .

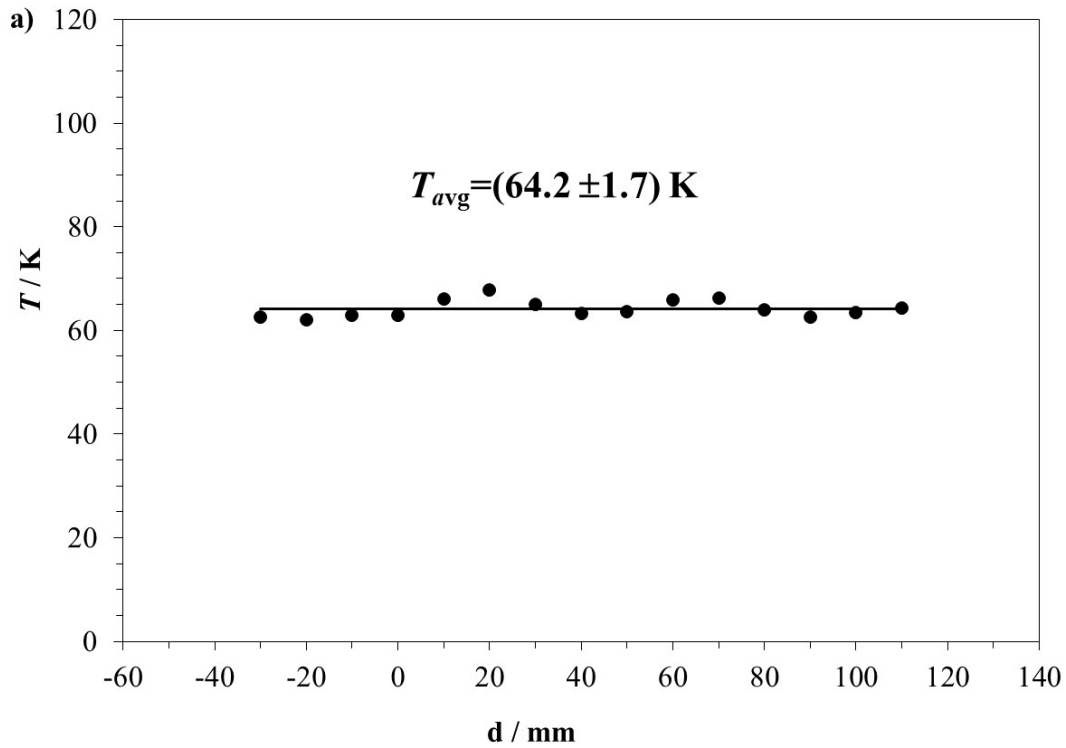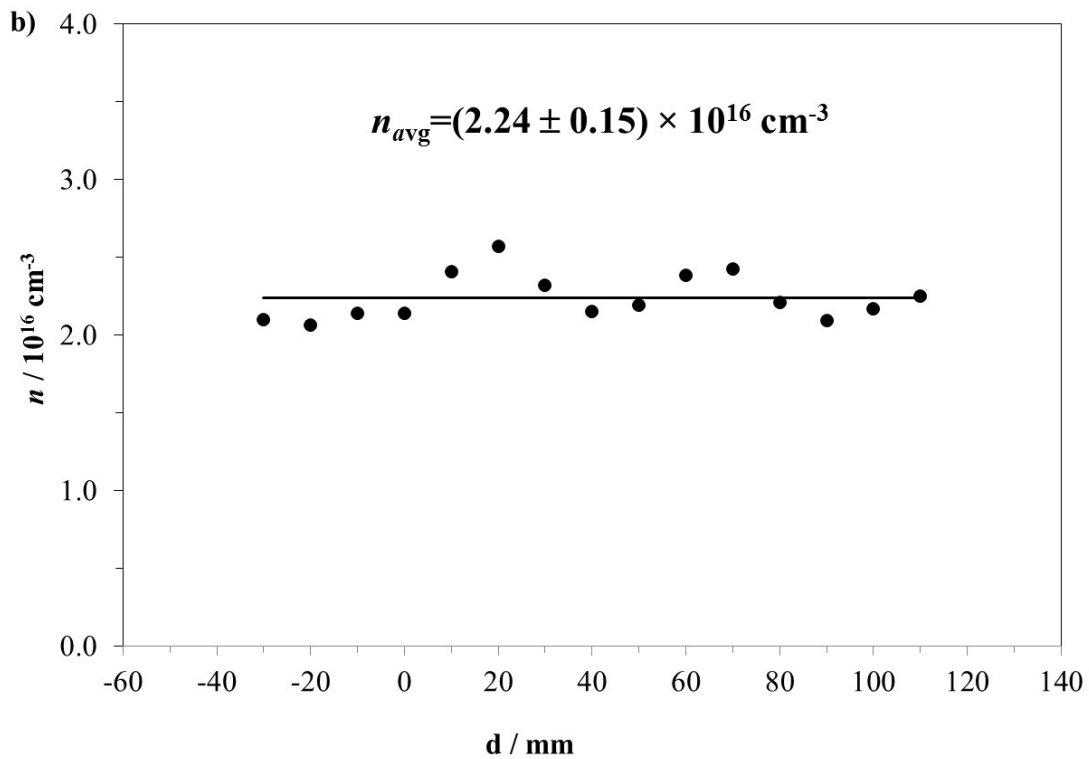

**Fig S2.** Spatial profiles of the temperature and total gas density of the jet for experimental conditions **D**. Uncertainty is  $\pm\sigma$ .
